# Supplementary material for: Electrochemical behavior of aluminum in triethylamine hydrochloride–aluminum chloride ionic liquid
Source: Royal Society of Chemistry journal article supplement (doi:10.1039/d3cp03403h), 2023-01-01
Supplement: d3cp03403h1.pdf [file d3cp03403h1.pdf]

## Electrochemical behavior of aluminum in triethylamine hydrochloride – aluminum chloride ionic liquid

A. V. Borozdin, P. Yu. Shevelin, V. A. Elterman<sup>a</sup>, L. A. Yolshina,

*Institute of High Temperature Electrochemistry, Ural Branch of the Russian Academy  
of Sciences, Yekaterinburg, Akademicheskaya 20, 620990, Russia*

### Supplementary materials

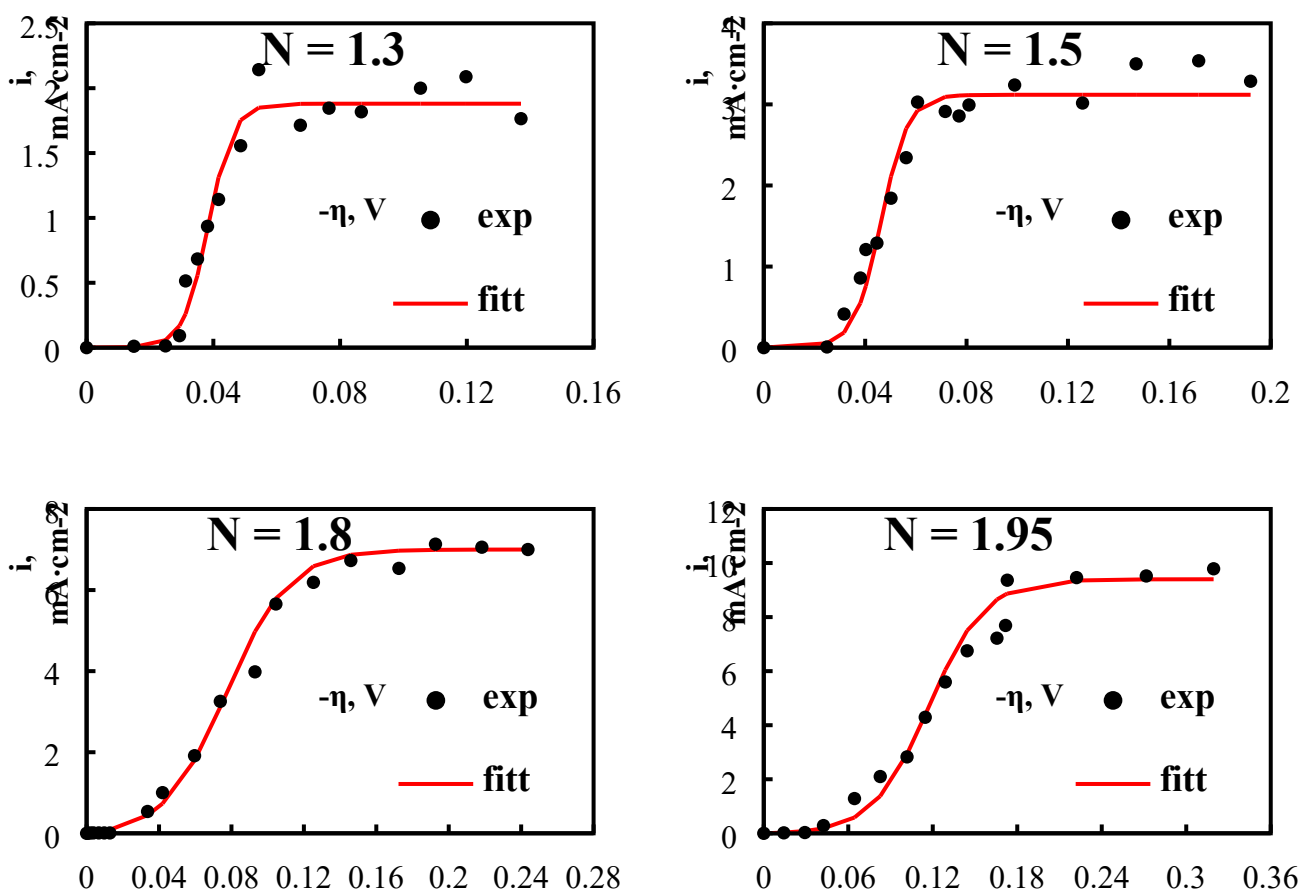

Figures s1-s4 – Experimental current density vs. cathodic overpotential at the aluminum electrode-electrolyte interface with  $1.3 \leq N \leq 1.95$

<sup>a</sup> Corresponding author. Tel.: +7 343 362 32 85; fax: +7 343 374 59 92.  
E-mail address: v.elterman@ihite.uran.ru (V.A. Elterman).

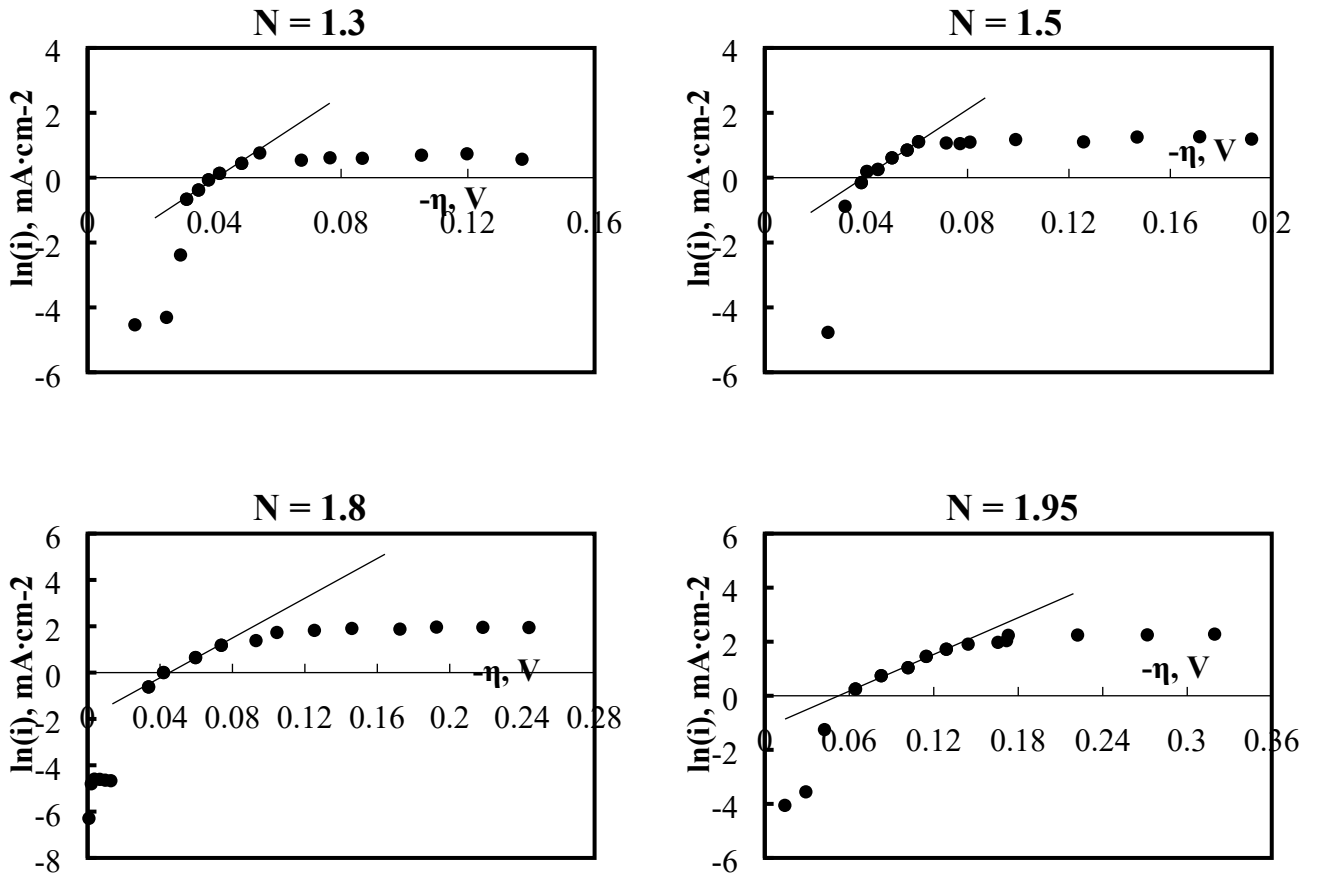

Figure s5-s8 – Cathodic polarization curves on a logarithmic current density scale

### Indirect measurement error estimation

The absolute measurement error for the apparent exchange current density was calculated as the error of indirect measurements according to the equation:

$$\Delta i_0(\theta, d, T) = \sqrt{\left(\frac{\partial i_0}{\partial \theta} \Delta \theta\right)^2 + \left(\frac{\partial i_0}{\partial d} \Delta d\right)^2 + \left(\frac{\partial i_0}{\partial T} \Delta T\right)^2}, \quad (\text{s1})$$

where  $\Delta \theta$ ,  $\Delta d$  and  $\Delta T$  are the absolute errors for the charge transfer resistance, electrode diameter and temperature, respectively. Half values of the scale interval of the caliper (0.005 cm) and mercury thermometer (0.5 K) were chosen as absolute errors for the electrode diameter and temperature measurement. The absolute measurement error for the charge transfer resistance was determined from the equation for the direct measurement error:

$$\Delta \theta = t_{St} \cdot \sqrt{\frac{\sum_{i=1}^{12} (\theta_i - \bar{\theta})^2}{n \cdot (n - 1)}}, \quad (\text{s2})$$

where  $t_{S\gamma}$  is Student's coefficient, which equals 2.179 in the case of 12 measurements ( $n$ ) and 0.95 confidence level;  $\bar{\theta}$  is the arithmetic mean for the measurements of the charge transfer resistance;  $\theta_i$  is the result of the  $i^{\text{th}}$  measurement of the charge transfer resistance.

Eq. s3 was obtained after mathematical transformations of Eq. s1 to calculate the error of indirect measurements of the apparent exchange current density.

$$\Delta i_0 = \frac{4R}{nF\theta\pi d^2} \sqrt{\left(\frac{T}{\theta}\Delta\theta\right)^2 + \left(\frac{2T}{d}\Delta d\right)^2 + (\Delta T)^2}. \quad (\text{s3})$$

The measurement error for the charge transfer resistance makes the largest contribution to the measurement error  $\Delta i_0$  (more than 93%). Therefore eq. s3 can be simplified by neglecting  $\Delta d$  and  $\Delta T$ :

$$\Delta i_0 = \frac{4RT}{nF\theta^2\pi d^2} \Delta\theta. \quad (\text{s4})$$
